# Supplementary material
Source: PubMed Central journal article supplement (PMC543869)
Supplement: bmj_38286.493206.82_1.pdf [file bmj_38286.493206.82_1.pdf]

### Appendix 1: Check list for monitoring the consultations.

| Standard | Description                                                                                                              | Score available                       |
|----------|--------------------------------------------------------------------------------------------------------------------------|---------------------------------------|
| 1.       | Patients views /perceptions /fears /beliefs elicited                                                                     | 0 - 2*                                |
| 2.       | Patients views /perceptions /fears /beliefs listened to                                                                  | 0 - 2*                                |
| 3.       | Physiotherapist establishes an adult-adult relationship                                                                  | 0 - 2*                                |
| 4.       | Use of encouragement/reassurance                                                                                         | 0 - 2*                                |
| 5.       | The focus is on function rather than pain                                                                                | 0 - 2*                                |
| 6.       | Patients are<br>a) Given good quality information<br>b) Given good quality explanations gently challenged about beliefs: | 0 - 1**<br><br>0 - 1**                |
| 7.       | Patient helped to change unhelpful behaviours:<br>a) Pacing<br>b) Goal setting<br>c) Problem Solving                     | 0 - 1**<br><br>0 - 1**<br><br>0 - 1** |
| 8.       | Planning for flare-ups discussed                                                                                         | 0 - 1**                               |
| 9.       | Modelling of exercises used                                                                                              | 0 - 1**                               |
| 10.      | Active listening used:<br>a) Body Language<br>b) Eye contact                                                             | 0 - 2*<br><br>0 - 2*                  |
| 11.      | Use of jargon                                                                                                            | 0 - 2*                                |
| 12.      | A hands-off approach used                                                                                                | 0 - 2*                                |
| 13.      | The patient is empowered to take control                                                                                 | 0 - 2*                                |
|          | <u>Total Score Possible</u>                                                                                              | <b>27</b>                             |

\* Score: 0 = not achieved at all; 1 = partly achieved during the assessment; 2 = achieved consistently

\*\* Score: 0 = not achieved; 1 = achieved.

## Appendix 2: The overall scores achieved by eight physiotherapists

| Physiotherapist | 'Usual' Physiotherapy |            | Brief Intervention |            |
|-----------------|-----------------------|------------|--------------------|------------|
|                 | Score*                | Percentage | Score*             | Percentage |
| 1               | 6                     | 22         | 24                 | 89         |
| 2               | 10                    | 37         | 25                 | 93         |
| 3               |                       |            | 25                 | 93         |
| 4               | 8                     | 30         | 25                 | 93         |
| 5               | 11                    | 41         | 24                 | 89         |
| 6               | 11                    | 41         | 26                 | 96         |
| 7               |                       |            | 26                 | 96         |
| 8               | 12                    | 44         |                    |            |
| <b>MEANS</b>    | <b>10</b>             | <b>36%</b> | <b>25</b>          | <b>93%</b> |

\*maximum score possible = 27
